# Supplementary material for: Huddling with families after disaster: Human resilience and social disparity
Source: PubMed Central journal article supplement (PMC9518864; doi:10.1371/journal.pone.0273307), 2022-09-28
Supplement: pone.0273307.s002.pdf [file pone.0273307.s002.pdf]

**S1 Table. Exploring Mechanism 1: Heterogeneous Treatment Effects across Time-of-the-day and Day-of-the-week**

|                                 | Treated vs. Control     | Treated vs. Part vs. Control |
|---------------------------------|-------------------------|------------------------------|
| weekendDay                      | 0.0669***<br>(0.00161)  | 0.0682***<br>(0.00156)       |
| weekdayDay                      | 0.0455***<br>(0.00164)  | 0.0468***<br>(0.00178)       |
| weekendNight                    | -0.0479***<br>(0.00123) | -0.0479***<br>(0.00123)      |
| Treat × Post × weekendDay       | 0.0130***<br>(0.00461)  | 0.0130***<br>(0.00461)       |
| Treat × Post × weekdayDay       | 0.0212***<br>(0.00407)  | 0.0212***<br>(0.00407)       |
| Treat × Post × weekendNight     | 0.0236***<br>(0.00561)  | 0.0236***<br>(0.00561)       |
| Treat × Post × weekdayNight     | 0.0298***<br>(0.00475)  | 0.0298***<br>(0.00475)       |
| PartTreat × Post × weekendDay   |                         | 0.0262***<br>(0.00257)       |
| PartTreat × Post × weekdayDay   |                         | 0.0196***<br>(0.00209)       |
| PartTreat × Post × weekendNight |                         | 0.0371***<br>(0.00324)       |
| PartTreat × Post × weekdayNight |                         | 0.0264***<br>(0.00254)       |
| Post × weekendDay               | 0.0682***<br>(0.00197)  | 0.0688***<br>(0.00197)       |
| Post × weekdayDay               | 0.0147***<br>(0.00161)  | 0.0153***<br>(0.00162)       |
| Post × weekendNight             | 0.136***<br>(0.00257)   | 0.136***<br>(0.00254)        |
| Post × weekdayNight             | 0.128***<br>(0.00205)   | 0.127***<br>(0.00203)        |
| Treat × weekendDay              | 0.00336<br>(0.0386)     | -0.0165<br>(0.0354)          |
| Treat × weekdayDay              | 0.0185<br>(0.0386)      | -0.00138<br>(0.0353)         |
| Treat × weekendNight            | -0.0291<br>(0.0387)     | -0.0490<br>(0.0355)          |
| Treat × weekdayNight            | -0.0353<br>(0.0386)     | -0.0552<br>(0.0354)          |
| PartTreat × weekendDay          |                         | -0.0435**<br>(0.0190)        |
| PartTreat × weekdayDay          |                         | -0.0265<br>(0.0190)          |
| PartTreat × weekendNight        |                         | -0.0566***<br>(0.0191)       |
| PartTreat × weekdayNight        |                         | -0.0380**<br>(0.0191)        |
| Individual Fixed Effect         | Yes                     | Yes                          |
| # Obs.                          | 36,020,422              | 93,631,371                   |
| # Users                         | 49,322                  | 123,298                      |

Robust and clustered standard errors are in parentheses. \*\*\*  $p < 0.01$ , \*\*  $p < 0.05$ , \*  $p < 0.1$ .
