# Supplementary material for: Huddling with families after disaster: Human resilience and social disparity
Source: PubMed Central journal article supplement (PMC9518864; doi:10.1371/journal.pone.0273307), 2022-09-28
Supplement: pone.0273307.s004.pdf [file pone.0273307.s004.pdf]

**S4 Table. Migrations across Cities**

| City                            | # (%) Appearing<br>in Other Cities | # (%) Appearing<br>in Wilmington |
|---------------------------------|------------------------------------|----------------------------------|
| Wilmington (treated)            | 165 (2.16%)                        | NA                               |
| Newport News (control)          | 99 (5.14%)                         | 14 (.07%)                        |
| Savannah (control)              | 1347 (5.97%)                       | 85 (.38%)                        |
| Charleston (partially treated)  | 1012 (4.05%)                       | 51 (.20%)                        |
| Chattanooga (partially treated) | 2168 (7.89%)                       | 12 (.04%)                        |
| Knoxville (partially treated)   | 1991 (8.02%)                       | 13 (.05%)                        |
