# Supplementary material for: Huddling with families after disaster: Human resilience and social disparity
Source: PubMed Central journal article supplement (PMC9518864; doi:10.1371/journal.pone.0273307), 2022-09-28
Supplement: pone.0273307.s005.pdf [file pone.0273307.s005.pdf]

**S5 Table. Alternative Specification: Fractional Logistic Regression**

|                     | Overall              | 1st week             | 1st month            | 2nd month            | 3rd month            |
|---------------------|----------------------|----------------------|----------------------|----------------------|----------------------|
| Post                | 1.0040***<br>(.0011) | .9910***<br>(.0018)  | 1.0360***<br>(.0012) | 1.0180***<br>(.0012) | .9020***<br>(.0014)  |
| Treat               | -.4830***<br>(.0028) | -.4820***<br>(.0028) | -.4830***<br>(.0028) | -.4830***<br>(.0028) | -.4820***<br>(.0028) |
| Treat $\times$ Post | .4230***<br>(.0030)  | -1.056***<br>(.0101) | .2100***<br>(.0035)  | .5060***<br>(.0033)  | .5320***<br>(.0036)  |
| # Obs.              | 36,020,422           | 11,362,782           | 19,506,976           | 20,030,180           | 14,903,946           |

Robust and clustered standard errors are in parentheses. \*\*\*  $p < 0.01$ , \*\*  $p < 0.05$ , \*  $p < 0.1$ .
