# Supplementary material for: Huddling with families after disaster: Human resilience and social disparity
Source: PubMed Central journal article supplement (PMC9518864; doi:10.1371/journal.pone.0273307), 2022-09-28
Supplement: pone.0273307.s006.pdf [file pone.0273307.s006.pdf]

**S6 Table. Magnitude of the Shift in Family Colocation: DV = Dummy**

|                  | Treated vs Control    | Treated vs Partially<br>Treated and Control |
|------------------|-----------------------|---------------------------------------------|
| Post             | 1.009***<br>(0.0137)  | 1.006***<br>(0.0137)                        |
| Treat            | -0.533***<br>(0.0387) | -0.532***<br>(0.0386)                       |
| PartTreat        |                       | 0.0111<br>(0.0177)                          |
| Treat × Post     | 0.446***<br>(0.0381)  | 0.446***<br>(0.0380)                        |
| PartTreat × Post |                       | 0.204***<br>(0.0167)                        |
| # Obs.           | 36,020,422            | 93,631,371                                  |
| # Users          | 49,322                | 123,298                                     |

Robust and clustered standard errors are in parentheses. \*\*\*  $p < 0.01$ , \*\*  $p < 0.05$ , \*  $p < 0.1$ .
