# Supplementary material for: Huddling with families after disaster: Human resilience and social disparity
Source: PubMed Central journal article supplement (PMC9518864; doi:10.1371/journal.pone.0273307), 2022-09-28
Supplement: pone.0273307.s007.pdf [file pone.0273307.s007.pdf]

**S7 Table. Dynamics and Duration in the Shift in Family Colocation: DV = Dummy**

|              | Treated vs Control    |                       |                       |                       |
|--------------|-----------------------|-----------------------|-----------------------|-----------------------|
|              | 1st week              | 1st month             | 2nd month             | 3rd month             |
| Post         | 0.998***<br>(0.0132)  | 1.049***<br>(0.0134)  | 1.021***<br>(0.0142)  | 0.900***<br>(0.0147)  |
| Treat        | -0.533***<br>(0.0386) | -0.533***<br>(0.0386) | -0.533***<br>(0.0387) | -0.532***<br>(0.0386) |
| Treat × Post | -1.090***<br>(0.0519) | 0.218***<br>(0.0369)  | 0.539***<br>(0.0392)  | 0.564***<br>(0.0400)  |
| # Obs.       | 11,362,782            | 19,506,976            | 20,030,180            | 14,903,946            |
| # Users      | 48,415                | 48,954                | 48,869                | 48,770                |

  

|                  | Treated vs Partially Treated and Control |                       |                       |                       |
|------------------|------------------------------------------|-----------------------|-----------------------|-----------------------|
|                  | 1st week                                 | 1st month             | 2nd month             | 3rd month             |
| Post             | 0.994***<br>(0.0132)                     | 1.046***<br>(0.0133)  | 1.046***<br>(0.0133)  | 0.897***<br>(0.0147)  |
| Treat            | -0.531***<br>(0.0386)                    | -0.532***<br>(0.0386) | -0.532***<br>(0.0386) | -0.531***<br>(0.0385) |
| PartTreat        | 0.0110<br>(0.0176)                       | 0.0111<br>(0.0176)    | 0.0111<br>(0.0176)    | 0.0109<br>(0.0176)    |
| Treat × Post     | -1.087***<br>(0.0518)                    | 0.217***<br>(0.0368)  | 0.217***<br>(0.0368)  | 0.563***<br>(0.0399)  |
| PartTreat × Post | 0.192***<br>(0.0163)                     | 0.184***<br>(0.0164)  | 0.184***<br>(0.0164)  | 0.242***<br>(0.0179)  |
| # Obs.           | 26,755,175                               | 49,772,315            | 49,387,158            | 35,956,406            |
| # Users          | 121,291                                  | 122,448               | 122,248               | 122,006               |

Robust and clustered standard errors are in parentheses. \*\*\*  $p < 0.01$ , \*\*  $p < 0.05$ , \*  $p < 0.1$ .
