# Supplementary material for: Huddling with families after disaster: Human resilience and social disparity
Source: PubMed Central journal article supplement (PMC9518864; doi:10.1371/journal.pone.0273307), 2022-09-28
Supplement: pone.0273307.s009.pdf [file pone.0273307.s009.pdf]

**S9 Table. Dynamics and Duration of the Shift in Family Colocation (Measured by Distance from Home)**

|              | Treated vs Control   |                      |                      |                      |
|--------------|----------------------|----------------------|----------------------|----------------------|
|              | 1st week             | 1st month            | 2nd month            | 3rd month            |
| Post         | -69.42***<br>(12.17) | -19.03*<br>(11.12)   | -20.38<br>(13.72)    | 2.353<br>(16.61)     |
| Treat × Post | 172.2***<br>(45.09)  | -67.79***<br>(21.99) | -90.43***<br>(24.39) | -100.2***<br>(27.41) |
| # Obs.       | 11,362,782           | 19,506,976           | 20,030,180           | 14,903,946           |
| # Users      | 48,415               | 48,954               | 48,869               | 48,770               |

  

|                  | Treated vs Partially Treated and Control |                      |                      |                      |
|------------------|------------------------------------------|----------------------|----------------------|----------------------|
|                  | 1st week                                 | 1st month            | 2nd month            | 3rd month            |
| Post             | -71.16***<br>(12.30)                     | -22.90**<br>(11.27)  | -23.71*<br>(13.89)   | -1.383<br>(16.72)    |
| Treat × Post     | 172.3***<br>(45.13)                      | -76.25***<br>(22.24) | -95.26***<br>(24.56) | -105.2***<br>(27.57) |
| PartTreat × Post | 65.30***<br>(15.54)                      | -2.405<br>(14.47)    | 2.595<br>(17.60)     | -16.36<br>(20.61)    |
| # Obs.           | 26,755,175                               | 49,772,315           | 49,387,158           | 35,956,406           |
| # Users          | 121,291                                  | 122,448              | 122,248              | 122,006              |

Robust and clustered standard errors are in parentheses. \*\*\*  $p < 0.01$ , \*\*  $p < 0.05$ , \*  $p < 0.1$ .
